# Supplementary material for: Socio-demographic, clinical and offense-related characteristics of forensic psychiatric inpatients in Hunan, China: a cross-sectional survey
Source: Springer Nature journal article supplement (doi:10.1186/s12888-022-04508-8), 2023-01-18
Supplement: MOESM1 [file 23933598]

|               |     |       |     |      |    |      |
|---------------|-----|-------|-----|------|----|------|
| Schizophrenia | 394 | 85.5% | 345 | 86.7 | 50 | 79.4 |
| Others        | 67  | 14.5% | 53  | 13.3 | 13 | 20.6 |

---

\* $p < 0.05$ , \*\* $p < 0.01$
